# Supplementary material
Source: Springer Nature journal article supplement (https://www.springermedizin.de/resource/supplementary/12871_2012_149_MOESM2_ESM.pdf/9428938)
Supplement: MOESM2 [file 9428938]

**Sedative and Analgesic Drugs**

Patient No.

**ASAP – ECMO Study**

*Instructions: Document any boluses during the sampling period. If the sampling is outside the stipulated time points please document the actual time*

**BIS****RASS****Context of PK sampling (please tick )**
**Infusing new drug/drugs?** 
**Ceasing a current drug infusion?** 
**New Drug Name****Ceased Drug Name****Initial Bolus Dose****Initial Infusion Rate****Rate before ceasing Drug**
**Boluses during the sampling period: (Specify Time)**
**Change in Rate of Infusion: (Specify Rate)**
**Sampling time points (minutes)****0****15****30****45****0****15****30****45**

Actual Time:

-- : --

-- : --

-- : --

-- : --

-- : --

-- : --

-- : --

-- : --

--

**60****120****180****240****60****120****180****240**

Actual Time:

-- : --

-- : --

-- : --

-- : --

-- : --

-- : --

-- : --

-- : --
